# Supplementary material for: Phosphatidylserine receptors enhance SARS-CoV-2 infection
Source: PubMed Central journal article supplement (PMC8641883; doi:10.1371/journal.ppat.1009743), 2021-11-19
Supplement: ppat.1009743.s002.pdf [file ppat.1009743.s002.pdf]

# S2 Fig

## S2A

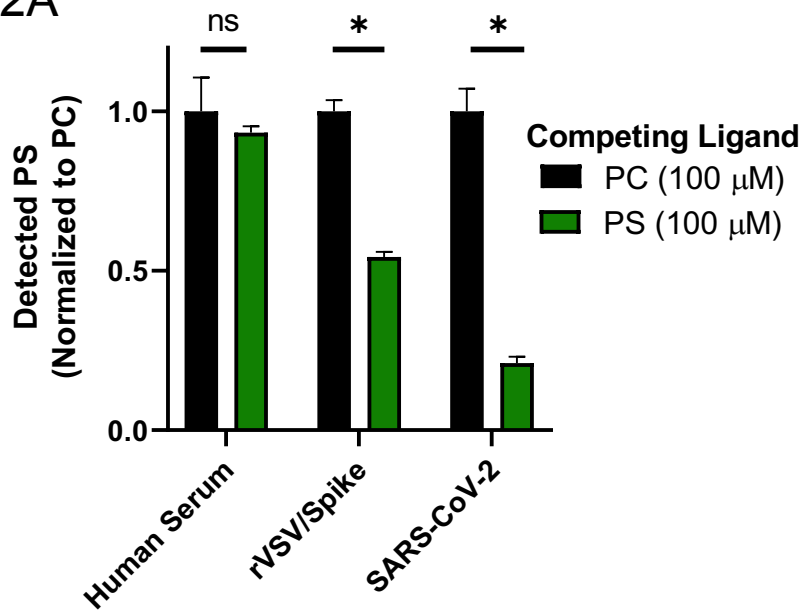

## S2B

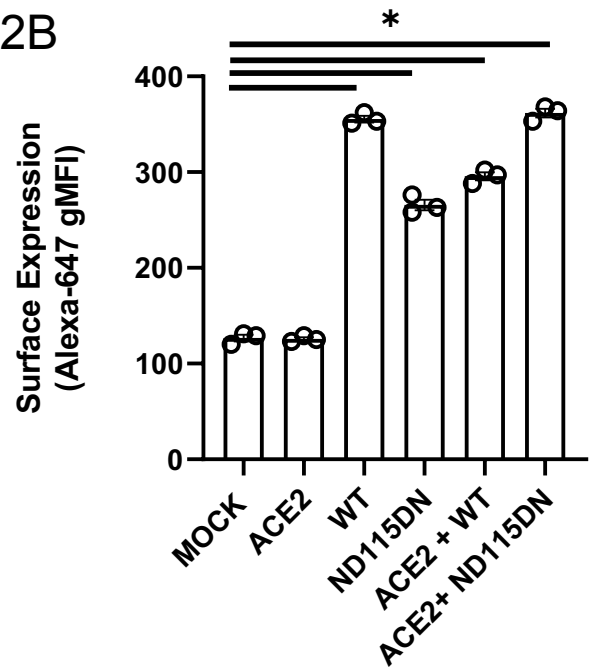

## S2C

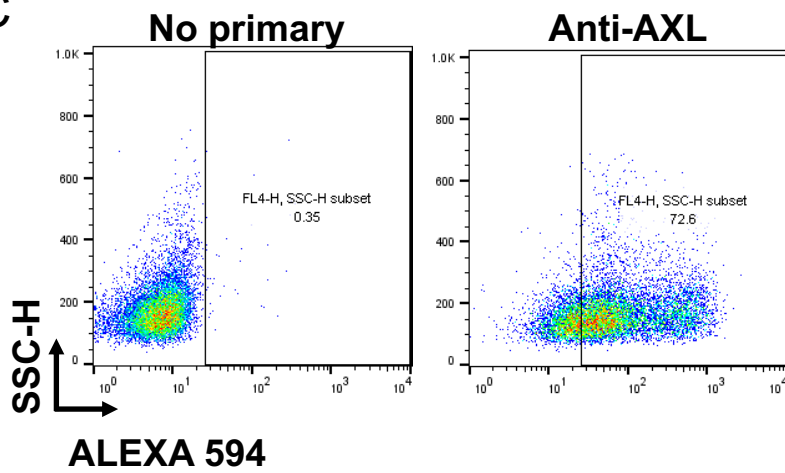

## S2D

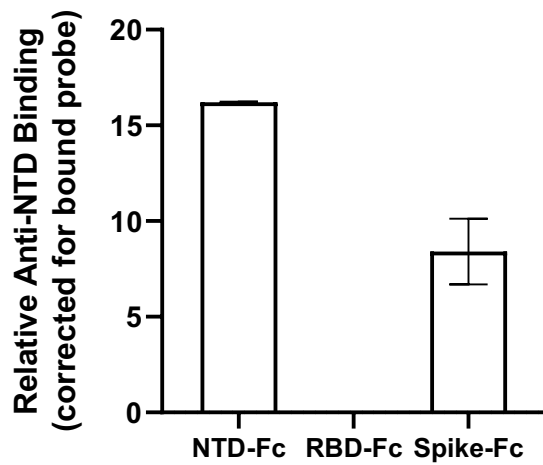

## S2E

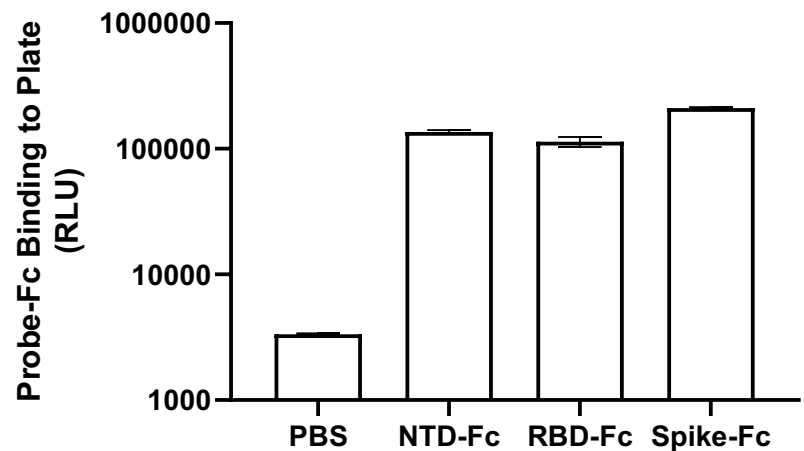

**S2 Fig: PS receptors interact with SARS-CoV-2 by binding to PS.**  
**S2A)** PS liposomes compete with PS on purified virions for binding to bavituximab. **S2B)** TIM-1 mutant ND115DN is highly expressed after plasmid transfection in HEK 293T cells. **S2C)** AXL surface expression in transfected HEK 293T cells. **S2D)** Purified Spike ectodomain-Fc and NTD-Fc are detected by an NTD monoclonal antibody by ELISA. **S2E)** All Spike-Fc proteins bind and are detected at equivalent levels of ELISA plates.

Data represented as means  $\pm$  SEM. Two-Way ANOVA with multiple comparisons (**S2A**), One-Way ANOVA with multiple comparisons (**S2B**); asterisks represent  $p < 0.05$ .
