# Supplementary material for: Phosphatidylserine receptors enhance SARS-CoV-2 infection
Source: PubMed Central journal article supplement (PMC8641883; doi:10.1371/journal.ppat.1009743), 2021-11-19
Supplement: ppat.1009743.s003.pdf [file ppat.1009743.s003.pdf]

S3 Fig

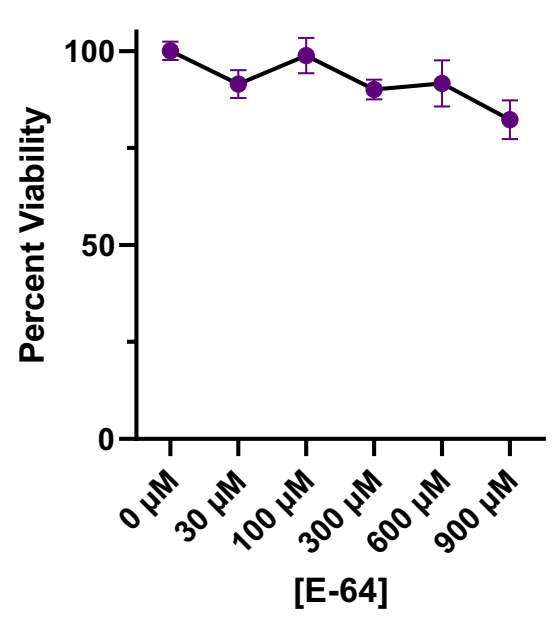

**S3 Fig: The route of SARS-CoV-2 entry is altered by TMPRSS2 expression.** ATPLite cytotoxicity assay in human lung cells, H1650, 24 hours following treatment with E64. Data are represented as means  $\pm$  SEM.
