# Supplementary material for: Phosphatidylserine receptors enhance SARS-CoV-2 infection
Source: PubMed Central journal article supplement (PMC8641883; doi:10.1371/journal.ppat.1009743), 2021-11-19
Supplement: ppat.1009743.s004.pdf [file ppat.1009743.s004.pdf]

# S4 Fig

## S4A

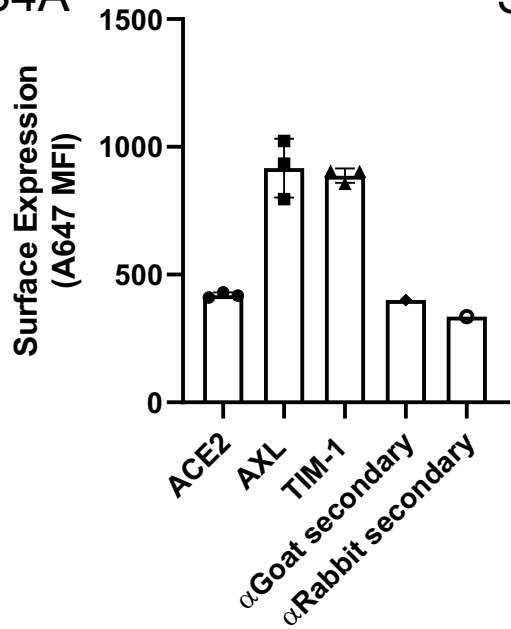

## S4B

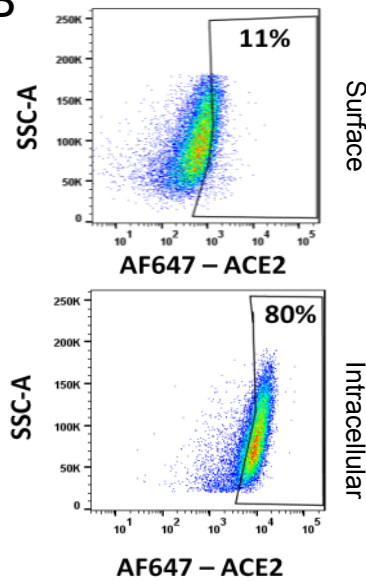

## S4C

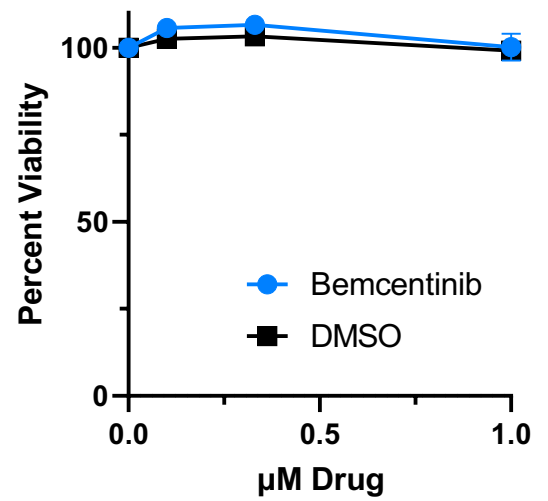

## S4D

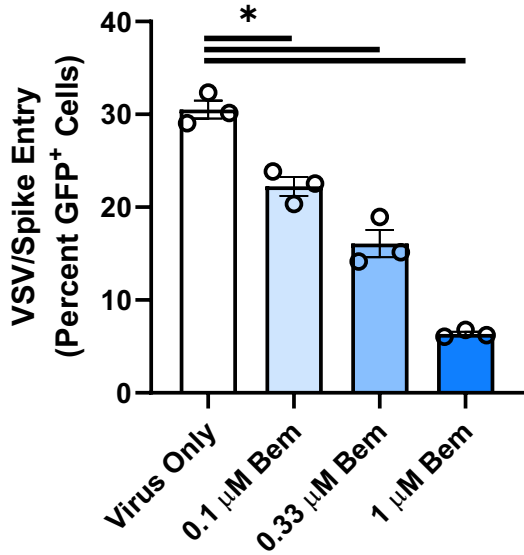

## S4E

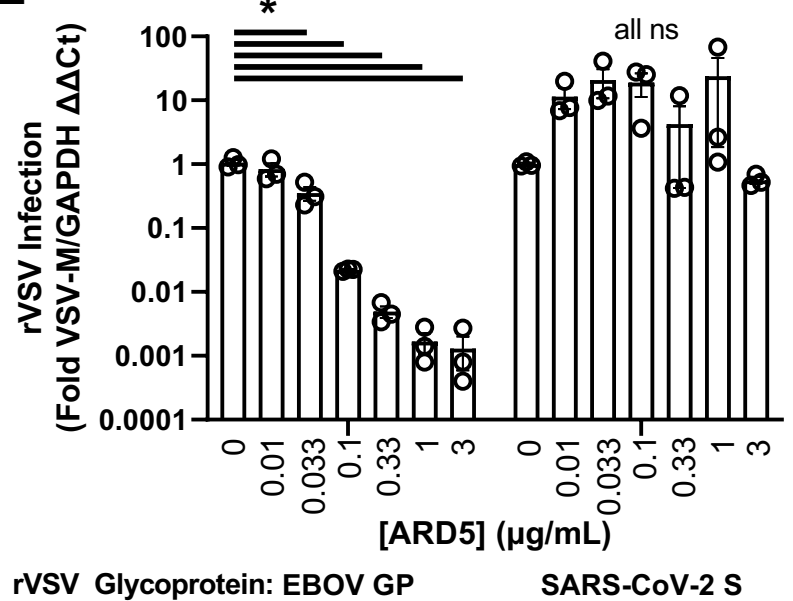

## S4F

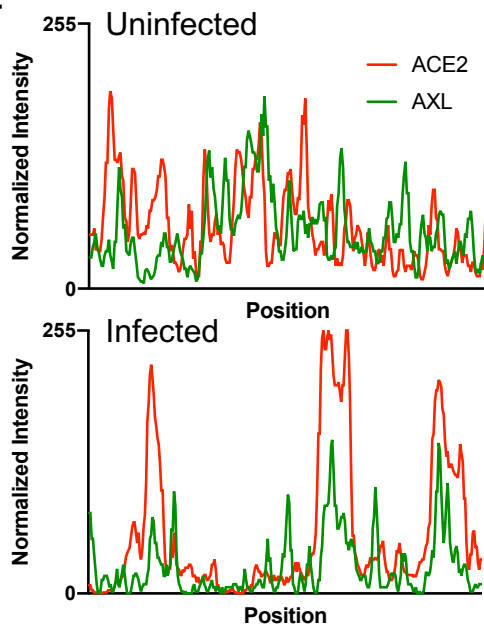

**S4 Fig: AXL has a prominent role in SARS-CoV-2 entry in Vero E6 cells. S4A)** ACE2, AXL and TIM-1 surface expression MFI in Vero E6 cells, as assessed by flow cytometry. Background fluorescence is shown for secondary antibodies used in experiment. **S4B)** Cell surface versus intracellular ACE2 expression in Vero E6 cells. Cells were lifted, permeabilized as noted, and stained with anti-ACE2 unconjugated primary antibodies and Alexa 647 secondaries and analyzed by flow cytometry. **S4C)** Bemcentinib toxicity 24 hours after treatment was measured by ATPlite assay in H1650 cell line. **S4D)** VSV/Spike entry was measured by flow cytometry 24 hours after virus challenge of Vero E6 cells treated with bemcentinib. **S4E)** Vero E6 were treated with ARD5 (anti-human TIM-1 blocking antibody) 1 hour before infection with rVSV/Spike or rVSV/EBOV-GP (MOI = 0.01). Viral load was measured 24 hpi by RT-qPCR and presented normalized to the highest MOI for each rVSV. **S4F)** Plot profiles of ACE2 and AXL intensity are shown from STED micrographs in Fig 4F, representing signal intensity along the yellow lines in the merged panels. Data (**S4A**, **S4C**, **S4D**, **S4E**) are shown as means  $\pm$  SEM. Multiple t-tests were performed in **S4C** and Student's t-test was performed in (**S4D**, **S4E**); asterisks represent  $p < 0.05$ .
