# Supplementary material for: Phosphatidylserine receptors enhance SARS-CoV-2 infection
Source: PubMed Central journal article supplement (PMC8641883; doi:10.1371/journal.ppat.1009743), 2021-11-19
Supplement: ppat.1009743.s007.pdf [file ppat.1009743.s007.pdf]

# S7 Fig

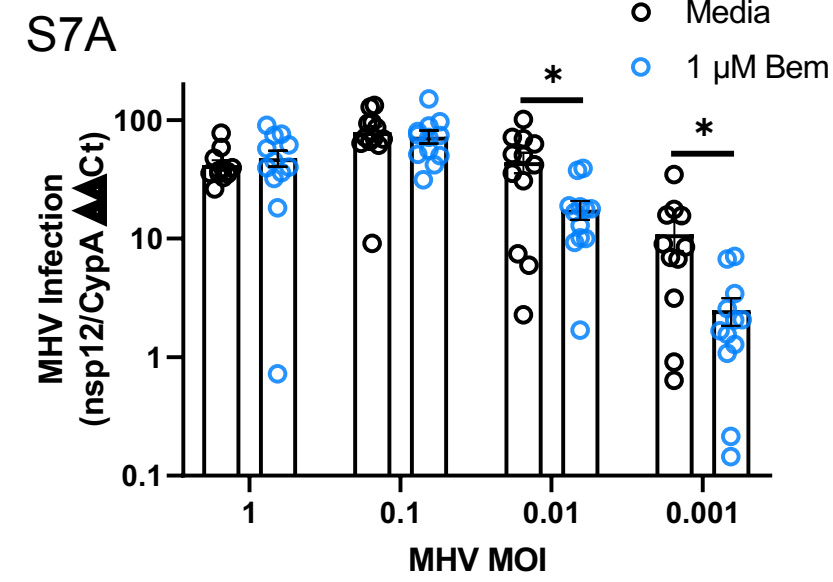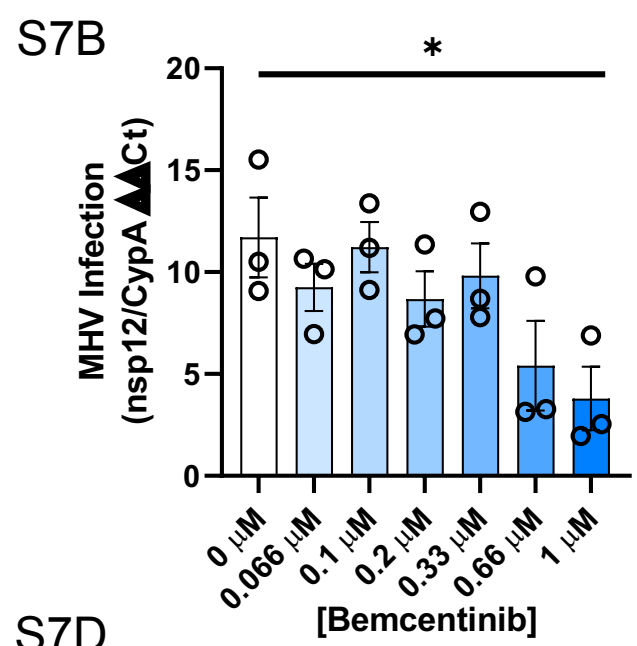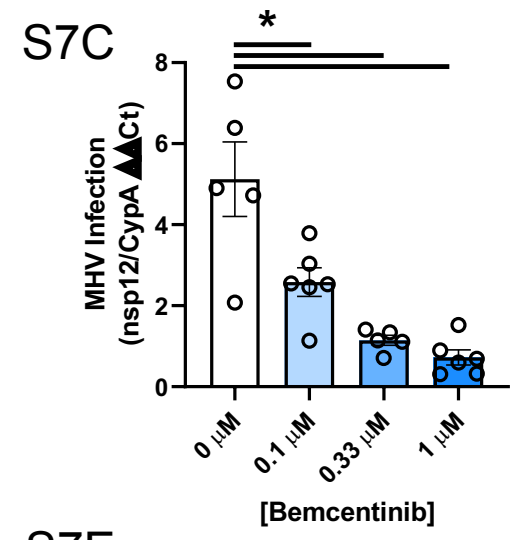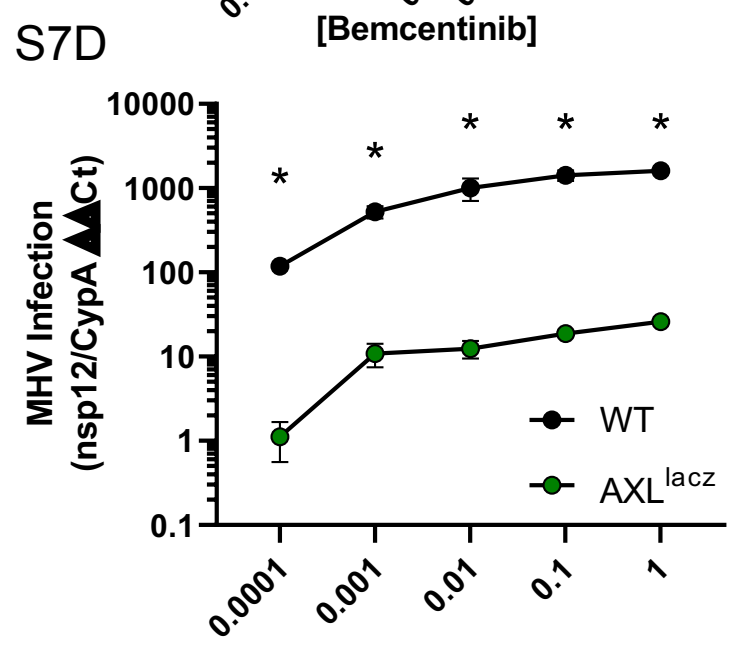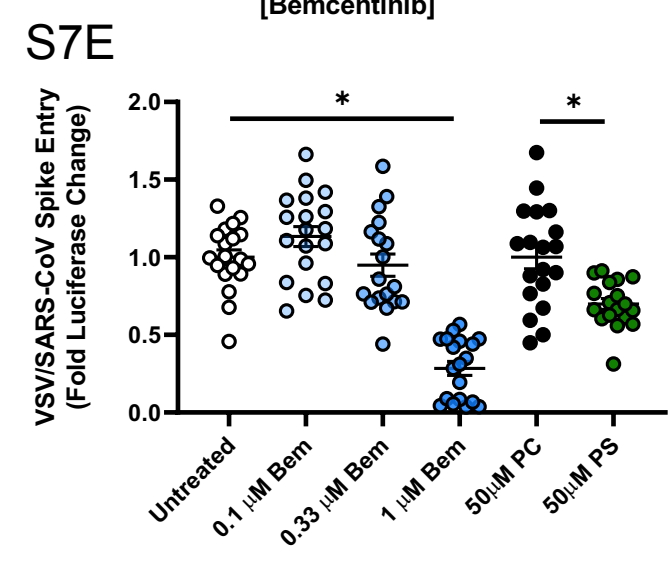

**S7 Fig: S7A)** Bone marrow derived macrophages from C57bl6/J mice were treated as indicated and challenged with MHV (strain A59) at the indicated MOI. Viral loads were assessed 24 hpi by RT-qPCR. **S7B)** BMDMs were treated with indicated concentrations of bemcentinib for 1 hour, infected with MHV (MOI = 0.001) for 24 hours and viral load assessed by RT-qPCR. **S7C)** As in B, MHV infection of murine peritoneal macrophages (MOI =0.001) treated with indicated concentrations of bemcentinib. **S7D)** Peritoneal macrophages from WT and AXL<sup>lacZ</sup> mice were infected with MHV at multiple MOIs, and viral load was quantified 24 hpi. **S7E)** VSV/Spike pseudovirions were incubated with Vero E6 cells in the presence of the indicated compounds, and infection was assessed for luciferase activity 48 hours later.

Data shown are 2 pooled (**S7D**, **S7E**) or representative of 3 independent (**S7A**, **S7B**, **S7C**) experiments. Data represented as means ± SEM. Student's t-test; asterisks represent  $p < 0.05$ .
